# Supplementary material for: Building support for children and families affected by stroke (BUILD CARE): Study protocol
Source: PubMed Central journal article supplement (PMC11798504; doi:10.1371/journal.pone.0308765), 2025-02-05
Supplement: pone.0308765.s002.pdf [file pone.0308765.s002.pdf]

## Supporting Information 2

### Work Package 2 – Part 4: Questions related to the built environment

1. How long have you been living in your home?

2. Did you have to move because of your child's needs?

yes

no

2.1. Do you rent or own the home?

rent

own

3. Did you have to make any modifications to your current home?

yes

no

3.1. If yes, where?

Multiple Choice, multiple answers possible:

entrance area

kitchen

living area

bathroom

children's room

no modification

others: \_\_\_\_\_

3.2. What was the reason for the modification?

Multiple Choice, multiple answers possible:

needs of the child

barriers in everyday life

accessibility

usable with one hand

more independence for  
the child

recommendations from  
therapist, other families, etc.

other reasons: \_\_\_\_\_

3.3. Has the modification proven helpful?

yes

no

I don't know

3.4. Is there a modification to your home you would like to do but have not yet done?

*Open-ended*

3.5. If yes, what is the reason for not implementing this modification?

Multiple Choice, multiple answers possible:

- financial reasons                       time-related reasons                       structure of the building
- renting or other legal reasons                       no design ideas for improvement
- other reasons: \_\_\_\_\_
